# Supplementary material for: Female Mice Susceptibility to the Dietary Omega-3/Omega-6 Fatty Acid Ratio: Effects on Adult Hippocampal Neurogenesis and Glia
Source: Preprints.org preprint supplement (doi:10.20944/preprints202202.0265.v1), 2022-02-22
Supplement: Supplementary file 1 [file supplementary]

## Sheet: Weight variation per day
Data table Weight variation (g)
Animal Id	Diet	LPS Tretament	Sex	Pre-LPS	Early post-LPS	Mid post-LPS	Late post-LPS
O1	Balanced	Sal	Female	0.0224206	-0.15	0	0.0156863
O15	Balanced	Sal	Female	0.04	0.25	0.333333	0.0376812
O16	Balanced	Sal	Female	0.00166667	0.15	0.5	0.0347826
O3	Balanced	Sal	Female	0.154563	-0.3	0	0.027451
O13	Balanced	Sal	Male	0.117262	0.2	0.0666667	0.0586022
O19	Balanced	Sal	Male	0.155	0	0.166667	0.0318841
O20	Balanced	Sal	Male	0.135	0.05	0.2	0.0355072
O17	Balanced	LPS	Female	0.00833333	-1.1	0.733333	0.0478261
O18	Balanced	LPS	Female	0.045	-1.5	0.7	0.0456522
O2	Balanced	LPS	Female	0.0589286	-1.2	0.633333	0.0235294
O4	Balanced	LPS	Female	0.0882937	-1.3	0.766667	0.0343137
O14	Balanced	LPS	Male	0.0797619	-1.7	0.8	0.102151
O21	Balanced	LPS	Male	0.07	-1.2	0.6	0.0731884
O22	Balanced	LPS	Male	0.04	-1.7	0.633333	0.199275
O10	Deficient	Sal	Female	0.111905	-0.05	0	0.0311828
O23	Deficient	Sal	Female	0.0959259	0.2	0.133333	0.0355556
O24	Deficient	Sal	Female	0.0518519	0.3	0.0333333	0.111111
O28	Deficient	Sal	Male	0.141852	0.25	-0.0333333	0.115
O5	Deficient	Sal	Male	0.349603	0	-0.1	0.0176471
O6	Deficient	Sal	Male	0.22619	0.35	0.1	-0.0127451
O11	Deficient	LPS	Female	0.0892857	-1.2	0.633333	0.0731183
O12	Deficient	LPS	Female	0.11131	-1.35	0.6	0.0354839
O25	Deficient	LPS	Female	-0.0125926	-0.8	0.7	0.0533333
O26	Deficient	LPS	Female	0.0666667	-0.95	0.433333	0.0905556
O27	Deficient	LPS	Male	0.165185	-1.8	1.16667	0.12
O29	Deficient	LPS	Male	0.142963	-1.1	0.633333	0.115
O7	Deficient	LPS	Male	0.215079	-1.95	0.633333	0.0558824
3 WAY ANOVA (p value)
Condition	Diet effect	LPS effect	Sex effect	Interaction (p value)	Data transformation
Early post-LPS	0.3235	0.0001	0.1097	LPS x Sex (0.0229)	Y=Y*Log(Y+10)
Mid post-LPS	0.2564	0.0001	0.8175	None	None
Late post-LPS	0.2708	0.0189	0.0431	None	Y=Log(Y)
Pre-LPS Diet and Sex (LPS consolidated data) 2 WAY ANOVA (p value)
Diet Effect	Sex effect	Interaction (p value)	Data transformation
0.0061	0.0003	None	None
Tukey's
vs	Deficient Female	Balanced Male	Deficient Male
Balanced Female	0.8791	0.4042	0.0002
Deficient Female		0.8289	0.0012
Balanced Male			0.0126
Early post-LPS LPS Treatment and Sex 1 WAY ANOVA (p value)
General effect	0.0001	Data transformation	None
Tukey's
vs	LPS Female	Saline Male	LPS Male
Saline Female	0.0001	0.9225	0.0001
LPS Female		0.0001	0.0269
Saline Male			0.0001
Mid post-LPS LPS Treatment and Sex 2 WAY ANOVA (p value)
LPS Effect	Sex effect	Interaction (p value)	Data transformation
0.0001	0.9091	None	Y=Log(Y+1)
Tukey's
vs	LPS Female	Saline Male	LPS Male
Saline Female	0.0001	0.7804	0.0001
LPS Female		0.0001	0.8495
Saline Male			0.0001
Late post-LPS LPS Treatment and Sex 2 WAY ANOVA (p value)
LPS Effect	Sex effect	Interaction (p value)	Data transformation
0.0125	0.0338	None	Y=Log(Y)
Tukey's
vs	LPS Female	Saline Male	LPS Male
Saline Female	0.9116	0.9943	0.0103
LPS Female		0.9998	0.0718
Saline Male			0.071

## Sheet: Volumes
Volumes (mm3 )
Animal Id	Diet	LPS Tretament	Sex	SGZ	GCL	ML
O1	Balanced	Sal	Female	0.0478024	0.255046	0.163278
O15	Balanced	Sal	Female	0.0566338	0.230365	0.166416
O16	Balanced	Sal	Female	0.0465213	0.20965	0.140766
O3	Balanced	Sal	Female	0.0481752	0.226592	0.156787
O13	Balanced	Sal	Male	0.0514971	0.270825	0.166778
O19	Balanced	Sal	Male	0.0531961	0.237221	0.161844
O20	Balanced	Sal	Male	0.0589452	0.249886	0.172876
O17	Balanced	LPS	Female	0.0491647	0.185249	0.147117
O18	Balanced	LPS	Female	0.0494728	0.219724	0.150607
O2	Balanced	LPS	Female	0.0367235	0.18935	0.123419
O4	Balanced	LPS	Female	0.0414515	0.2061	0.142804
O14	Balanced	LPS	Male	0.0494667	0.242525	0.160449
O21	Balanced	LPS	Male	0.0419569	0.189719	0.129195
O22	Balanced	LPS	Male	0.0472697	0.20281	0.147619
O10	Deficient	Sal	Female	0.042253	0.201621	0.139632
O23	Deficient	Sal	Female	0.0452077	0.174249	0.131522
O24	Deficient	Sal	Female	0.0454358	0.183699	0.139369
O28	Deficient	Sal	Male	0.0606965	0.216122	0.168696
O5	Deficient	Sal	Male	0.0425852	0.224114	0.142724
O6	Deficient	Sal	Male	0.0428783	0.200043	0.137397
O11	Deficient	LPS	Female	0.0513184	0.228642	0.161492
O12	Deficient	LPS	Female	0.0464177	0.208294	0.152094
O25	Deficient	LPS	Female	0.0413352	0.16063	0.122439
O26	Deficient	LPS	Female	0.0397042	0.169987	0.124693
O27	Deficient	LPS	Male	0.057546	0.207903	0.164276
O29	Deficient	LPS	Male	0.0523696	0.193188	0.155191
O7	Deficient	LPS	Male	0.0394087	0.214109	0.137055
3 WAY ANOVA (p value)
Condition	Diet effect	LPS effect	Sex effect	Interaction (p value)	Data transformation
SGZ	0.4562	0.2088	0.1048	None	None
GCL	0.006	0.0301	0.0309	Diet x LPS(0.0442)	None
ML	0.1482	0.1554	0.0751	None	None
GCL Diet and LPS treatment vs Sex 2 WAY ANOVA (p value)
Diet and LPS effect	Sex effect	Interaction (p value)	Data transformation
0.0028	0.0309	None	None
Tukey's
Female vs	Deficient Saline	Balanced LPS	Deficient LPS
Balanced Saline	0.0492	0.1879	0.0659
Deficient Saline		0.8189	0.9855
Balanced LPS			0.9397
Male vs	Deficient Saline	Balanced LPS	Deficient LPS
Balanced Saline	0.1203	0.0991	0.0455
Deficient Saline		0.9996	0.9575
Balanced LPS			0.9781

## Sheet: Radial neuroprogenitors
Radial neuroprogenitors
Animal Id	Diet	LPS Tretament	Sex	nº Stem Cells
O1	Balanced	Sal	Female	6480.47
O15	Balanced	Sal	Female	4103.93
O16	Balanced	Sal	Female	3654.64
O3	Balanced	Sal	Female	3925.74
O13	Balanced	Sal	Male	5946.26
O19	Balanced	Sal	Male	4592.75
O20	Balanced	Sal	Male	7087.62
O17	Balanced	LPS	Female	5893.7
O18	Balanced	LPS	Female	6472.18
O2	Balanced	LPS	Female	2724.65
O4	Balanced	LPS	Female	7111.9
O14	Balanced	LPS	Male	3901.87
O21	Balanced	LPS	Male	4987.85
O22	Balanced	LPS	Male	2839.87
O10	Deficient	Sal	Female	3080.44
O23	Deficient	Sal	Female	2450.4
O24	Deficient	Sal	Female	3993.86
O28	Deficient	Sal	Male	4958.85
O5	Deficient	Sal	Male	4738.16
O6	Deficient	Sal	Male	4043.51
O11	Deficient	LPS	Female	2874.22
O12	Deficient	LPS	Female	3094.85
O25	Deficient	LPS	Female	3454.8
O26	Deficient	LPS	Female	3786.11
O27	Deficient	LPS	Male	3821.7
O29	Deficient	LPS	Male	3363.52
O7	Deficient	LPS	Male	3657.63
3 WAY ANOVA (p value)
Condition	Diet effect	LPS effect	Sex effect	Interaction (p value)	Data transformation
Stem Cells	0.0115	0.082	0.7346	LPS x Sex (0.0399)	Y=Log(Y+100)
Stem cells Diet vs LPS treatment and Sex 2 WAY ANOVA (p value)
Diet	LPS x Sex effect	Interaction (p value)	Data transformation
0.0115	0.1168	None	Y=Log(Y+100)
GCL Diet vs LPS Treatment (Sex consolidated data) 2 WAY ANOVA (p value)
Diet Effect	LPS effect	Interaction (p value)	Data transformation
0.339	0.3875	None	Y=1/(Y*sqrt(Y))
Tukey's
vs	Deficient Saline	Balanced LPS	Deficient LPS
Balanced Saline	0.3325	0.8504	0.1363
Deficient Saline		0.7768	0.9697
Balanced LPS			0.4789
Diet t Test	0.0111	Data transformation	Y=Log(Y)

## Sheet: DCX cells
DCX cells
Animal Id	Diet	LPS Tretament	Sex	AB	CD	EF	Total	% of AB	% of CD	% of EF
O1	Balanced	Sal	Female	4098.05	1403.44	4491.02	9992.51	41.0112	14.0449	44.9438
O15	Balanced	Sal	Female	4060.17	1297	4906.04	10263.2	39.5604	12.6374	47.8022
O16	Balanced	Sal	Female	2794.58	882.499	3186.8	6863.88	40.7143	12.8571	46.4286
O3	Balanced	Sal	Female	2525.13	785.597	4040.21	7350.94	34.3511	10.687	54.9618
O13	Balanced	Sal	Male	3147.35	468.754	2209.84	5825.94	54.023	8.04598	37.931
O19	Balanced	Sal	Male	2442.09	688.794	1690.68	4821.56	50.6494	14.2857	35.0649
O20	Balanced	Sal	Male	3216.44	1094.96	3421.74	7733.14	41.5929	14.1593	44.2478
O17	Balanced	LPS	Female	2905.93	1070.61	3619.67	7596.21	38.255	14.094	47.651
O18	Balanced	LPS	Female	2451.46	1197.23	4560.86	8209.54	29.8611	14.5833	55.5556
O2	Balanced	LPS	Female	2601.24	563.601	3034.78	6199.61	41.958	9.09091	48.951
O4	Balanced	LPS	Female	3027.61	943.026	3722.47	7693.1	39.3548	12.2581	48.3871
O14	Balanced	LPS	Male	2303.04	545.456	1878.79	4727.29	48.7179	11.5385	39.7436
O21	Balanced	LPS	Male	3158.26	775.713	3269.08	7203.05	43.8462	10.7692	45.3846
O22	Balanced	LPS	Male	2595.6	702.974	2217.07	5515.64	47.0588	12.7451	40.1961
O10	Deficient	Sal	Female	3049.32	532.42	2516.89	6098.63	50	8.73016	41.2698
O23	Deficient	Sal	Female	2571.35	413.253	2433.6	5418.21	47.4576	7.62712	44.9153
O24	Deficient	Sal	Female	2269.91	309.533	1496.08	4075.52	55.6962	7.59494	36.7089
O28	Deficient	Sal	Male	3459.01	1550.59	3220.46	8230.06	42.029	18.8406	39.1304
O5	Deficient	Sal	Male	2166.19	264.169	1320.85	3751.21	57.7465	7.04225	35.2113
O6	Deficient	Sal	Male	2648.99	337.145	2745.32	5731.46	46.2185	5.88235	47.8992
O11	Deficient	LPS	Female	2434.8	296.927	1781.56	4513.29	53.9474	6.57895	39.4737
O12	Deficient	LPS	Female	1425.25	513.09	1653.29	3591.63	39.6825	14.2857	46.0317
O25	Deficient	LPS	Female	934.246	442.538	1229.27	2606.05	35.8491	16.9811	47.1698
O26	Deficient	LPS	Female	1623.15	639.423	1967.46	4230.03	38.3721	15.1163	46.5116
O27	Deficient	LPS	Male	2160.92	720.307	1773.06	4654.29	46.4286	15.4762	38.0952
O29	Deficient	LPS	Male	2163.66	603.812	1257.94	4025.42	53.75	15	31.25
O7	Deficient	LPS	Male	2304.57	637.433	2108.43	5050.43	45.6311	12.6214	41.7476
3 WAY ANOVA (p value)							3 WAY ANOVA (p value)
Condition	Diet effect	LPS effect	Sex effect	Interaction (p value)	Data transformation		Condition	Diet effect	LPS effect	Sex effect	Interaction (p value)	Data transformation
AB	0.0055	0.0081	0.4545	None	Y=Log(Y)		% of AB	0.0474	0.1599	0.0163	None	None
CD	0.0039	0.4004	0.9297	None	Y=1/Y		% of CD	0.6139	0.1269	0.6423	None	None
EF	0.0002	0.1415	0.0205	Diet x Sex (0.0051)	None		% of EF	0.0323	0.5314	0.0014	None	None
Total DCX	0.0004	0.0514	0.4256	Diet x Sex (0.0184)	Y=Log(Y)
AB DCX cells Diet vs LPS Treatment (Sex consolidated data) 2 WAY ANOVA (p value)							% of AB DCX cells Diet vs Sex (LPS treatment consolidated data) 2 WAY ANOVA (p value)
Diet Effect	LPS effect	Interaction (p value)	Data transformation				Diet Effect	Sex effect	Interaction (p value)	Data transformation
0.003	0.004	None	None				0.064	0.0115	None	None
Tukey's							Tukey's
vs	Deficient Saline	Balanced LPS	Deficient LPS				vs	Deficient Female	Balanced Male	Deficient Male
Balanced Saline	0.3589	0.372	0.0005				Balanced Female	0.073	0.027	0.0132
Deficient Saline		0.9997	0.0426				Deficient Female		0.9436	0.8231
Balanced LPS			0.0269				Balanced Male			0.9908
CD DCX cells Diet vs LPS Treatment (Sex consolidated data) 2 WAY ANOVA (p value)							% of EF DCX cells Diet vs Sex (LPS treatment consolidated data) 2 WAY ANOVA (p value)
Diet Effect	LPS effect	Interaction (p value)	Data transformation				Diet Effect	Sex effect	Interaction (p value)	Data transformation
0.0031	0.9454	None	Y=Ln(Y)				0.0322	0.0007	None	None
Tukey's							Tukey's
vs	Deficient Saline	Balanced LPS	Deficient LPS				vs	Deficient Female	Balanced Male	Deficient Male
Balanced Saline	0.0154	0.999	0.1218				Balanced Female	0.0535	0.005	0.001
Deficient Saline		0.1198	0.999				Deficient Female		0.6797	0.3192
Balanced LPS			0.0154				Balanced Male			0.9277
EF DCX cells Diet and Sex 1 WAY ANOVA (p value)
General effect	0.0001	Data transformation	None
Tukey's
vs	Deficient Female	Balanced Male	Deficient Male
Balanced Female	0.0001	0.002	0.0002
Deficient Female		0.4193	0.9467
Balanced Male			0.763
Total DCX cells Diet and Sex 1 WAY ANOVA (p value)
General effect	0.0002	Data transformation	None
Tukey's
vs	Deficient Female	Balanced Male	Deficient Male
Balanced Female	0.0002	0.0499	0.0053
Deficient Female		0.18	0.6622
Balanced Male			0.793

## Sheet: BrdU DCX cells
				BrdU+ DCX cells
Animal Id	Diet	LPS Tretament	Sex	AB	CD	EF	% BrdU-AB cells/Total BrdU-DCX	% BrdU-CD cells/Total BrdU-DCX	% BrdU-EF cells/Total BrdU-DCX
O1	Balanced	Sal	Female	163.922	0	264.18	38.2905	0	61.7095
O15	Balanced	Sal	Female	38.3037	129.7	193.151	10.6059	35.9126	53.4815
O16	Balanced	Sal	Female	56.4561	0	150.321	27.3028	0	72.6972
O3	Balanced	Sal	Female	148.538	82.6943	200.011	34.4442	19.1758	46.38
O13	Balanced	Sal	Male	42.5333	0	78.9222	35.0196	0	64.9804
O19	Balanced	Sal	Male	109.347	0	120.763	47.5194	0	52.4806
O20	Balanced	Sal	Male	78.4489	54.7479	171.087	25.7815	17.9924	56.2261
O17	Balanced	LPS	Female	169.276	123.532	278.436	29.6329	21.6251	48.742
O18	Balanced	LPS	Female	29.1846	0	143.649	16.886	0	83.114
O2	Balanced	LPS	Female	92.9006	31.3114	262.623	24.0155	8.09425	67.8902
O4	Balanced	LPS	Female	214.073	37.721	275.738	40.5801	7.15047	52.2694
O14	Balanced	LPS	Male	59.1274	37.2961	286.951	15.4229	9.72836	74.8488
O21	Balanced	LPS	Male	59.5901	0	187.877	24.08	0	75.92
O22	Balanced	LPS	Male	81.1124	43.9359	110.854	34.384	18.6246	46.9914
O10	Deficient	Sal	Female	177.629	53.242	234.909	38.1357	11.4307	50.4335
O23	Deficient	Sal	Female	53.0187	91.8339	144.858	18.3006	31.6985	50.0009
O24	Deficient	Sal	Female	0	61.9067	178.105	0	25.7932	74.2068
O28	Deficient	Sal	Male	33.9122	96.912	155.204	11.8562	33.882	54.2617
O5	Deficient	Sal	Male	137.536	26.4169	169.339	41.2658	7.92607	50.8081
O6	Deficient	Sal	Male	120.41	0	205.899	36.9006	0	63.0994
O11	Deficient	LPS	Female	133.415	0	121.471	52.3431	0	47.6569
O12	Deficient	LPS	Female	121.297	0	214.316	36.142	0	63.858
O25	Deficient	LPS	Female	0	0	102.439	0	0	100
O26	Deficient	LPS	Female	113.905	79.9279	67.8438	43.5288	30.5446	25.9266
O27	Deficient	LPS	Male	236.351	0	141.845	62.4943	0	37.5057
O29	Deficient	LPS	Male	0	40.2544	0	0	100	0
O7	Deficient	LPS	Male	0	0	87.8521	0	0	100
							27.5901	14.0585	58.3514	Mean
3 WAY ANOVA (p value)							3.23229	4.06766	3.95759	SEM
Condition	Diet effect	LPS effect	Sex effect	Interaction (p value)	Data transformation
BrdU AB	0.1602	0.2712	0.9376	None	Y=Log(Y)
BrdU CD	0.9642	0.2927	0.1952	None	None
BrdU EF	0.0474	0.5942	0.0622	Diet x LPS treatment (0.0086)	None
BrdU+ EF DCX cells Diet and LPS treatment 1 WAY ANOVA (p value)
General effect	0.0143	Data transformation	None
Tukey's
vs	Deficient Saline	Balanced LPS	Deficient LPS
Balanced Saline	0.98	0.389	0.2369
Deficient Saline		0.6523	0.1381
Balanced LPS			0.0083

## Sheet: DCX Staining
				DCX Area fraction
Animal Id	Diet	LPS Tretament	Sex	SGZ	GCL	ML
O1	Balanced	Sal	Female	13.1727	5.4148	1.4697
O15	Balanced	Sal	Female	12.8458	4.9917	1.2283
O16	Balanced	Sal	Female	10.4082	3.5528	0.9985
O3	Balanced	Sal	Female	9.3768	3.7434	1.1364
O13	Balanced	Sal	Male	8.3026	2.5668	0.8716
O19	Balanced	Sal	Male	8.2871	2.2285	0.4417
O20	Balanced	Sal	Male	9.1987	2.6695	0.3107
O17	Balanced	LPS	Female	11.3268	3.9982	0.783
O18	Balanced	LPS	Female	11.9947	4.2652	0.7788
O2	Balanced	LPS	Female	13.6852	4.8377	1.0993
O4	Balanced	LPS	Female	10.5039	4.7443	1.5095
O14	Balanced	LPS	Male	4.9953	1.2646	0.3319
O21	Balanced	LPS	Male	11.8117	3.5917	0.6737
O22	Balanced	LPS	Male	7.9728	2.5349	0.4283
O10	Deficient	Sal	Female	10.5453	3.7539	1.2855
O23	Deficient	Sal	Female	11.8772	3.9103	0.7959
O24	Deficient	Sal	Female	6.5361	1.9298	0.3978
O28	Deficient	Sal	Male	11.4679	3.9982	0.7791
O5	Deficient	Sal	Male	5.5648	1.9812	0.4425
O6	Deficient	Sal	Male	8.747	3.3898	0.9905
O11	Deficient	LPS	Female	6.9881	2.1566	0.4514
O12	Deficient	LPS	Female	6.1064	1.9699	0.3932
O25	Deficient	LPS	Female	4.6846	1.6614	0.4801
O26	Deficient	LPS	Female	7.5778	2.672	1.0009
O27	Deficient	LPS	Male	6.8232	2.6386	0.7235
O29	Deficient	LPS	Male	8.1611	2.2224	0.3999
O7	Deficient	LPS	Male	6.8377	2.7717	0.636
DCX Area fraction 3 WAY ANOVA (p value)
Condition	Diet effect	LPS effect	Sex effect	Interaction (p value)	Data transformation
SGZ	0.0163	0.1669	0.0505	None	None
GCL	0.0264	0.1807	0.0071	Diet x Sex (0.0019)	None
ML	0.2405	0.1759	0.008	Diet x Sex (0.0183)	None
SGZ Area Fraction Diet vs Sex (LPS consolidated data) 2 WAY ANOVA (p value)
Diet Effect	Sex effect	Interaction (p value)	Data transformation
0.0124	0.0715	0.0465	None
SGZ Area Fraction Diet and Sex 1 WAY ANOVA (p value)
General effect	0.0042	Data transformation	None
Tukey's
vs	Deficient Female	Balanced Male	Deficient Male
Balanced Female	0.0075	0.0404	0.0152
Deficient Female		0.9385	0.9988
Balanced Male			0.9762
GCL Area Fraction Diet and Sex 1 WAY ANOVA (p value)
General effect	0.0001	Data transformation	None
Tukey's
vs	Deficient Female	Balanced Male	Deficient Male
Balanced Female	0.0006	0.0005	0.004
Deficient Female		0.9949	0.9326
Balanced Male			0.8512
ML Area Fraction Diet and Sex 1 WAY ANOVA (p value)
General effect	0.002	Data transformation	None
Tukey's
vs	Deficient Female	Balanced Male	Deficient Male
Balanced Female	0.0257	0.0021	0.0237
Deficient Female		0.6624	0.9985
Balanced Male			0.7753

## Sheet: Microglia
				Total microglia
Animal Id	Diet	LPS Tretament	Sex	SGZ	GCL	ML
O1	Balanced	Sal	Female	891.745	2694.61	1390.55
O15	Balanced	Sal	Female	1213.73	2875.96	1643.83
O16	Balanced	Sal	Female	1011.51	1863.05	973.284
O3	Balanced	Sal	Female	778.311	2244.56	1672.03
O13	Balanced	Sal	Male	849.494	2075.91	1060.62
O19	Balanced	Sal	Male	668.518	1815.91	1102.74
O20	Balanced	Sal	Male	1244.58	2395.22	1608.71
O17	Balanced	LPS	Female	1085.72	2447.1	1546.42
O18	Balanced	LPS	Female	1146.23	2679.5	1545.62
O2	Balanced	LPS	Female	984.007	2731.3	1175.26
O4	Balanced	LPS	Female	890.209	2432.01	1714.4
O14	Balanced	LPS	Male	457.734	1757.58	1628.45
O21	Balanced	LPS	Male	1436.37	2992.04	1717.49
O22	Balanced	LPS	Male	631.915	1351.87	1776.72
O10	Deficient	Sal	Female	1082.03	2613.7	1543.06
O23	Deficient	Sal	Female	818.366	1607.1	715.621
O24	Deficient	Sal	Female	529.273	1392.9	864.225
O28	Deficient	Sal	Male	1426.91	2504.8	1928.87
O5	Deficient	Sal	Male	633.226	1637.85	817.466
O6	Deficient	Sal	Male	641.711	1204.09	1062.83
O11	Deficient	LPS	Female	812.684	1365.87	1020.38
O12	Deficient	LPS	Female	722.04	1482.26	971.806
O25	Deficient	LPS	Female	597.535	1524.3	985.611
O26	Deficient	LPS	Female	666.7	1524.78	691.055
O27	Deficient	LPS	Male	961.582	1717.66	1084.06
O29	Deficient	LPS	Male	1115.32	1861.75	1101.97
O7	Deficient	LPS	Male	583.472	1225.83	1088.43
Microglia 3 WAY ANOVA (p value)
Condition	Diet effect	LPS effect	Sex effect	Interaction (p value)	Data transformation
SGZ	0.3149	0.7432	0.9299	None	None
GCL	0.0043	0.5182	0.2786	None	None
ML	0.0042	0.6461	0.357	None	None
GCL Microglia Diet vs LPS Treatment (Sex consolidated data) 2 WAY ANOVA (p value)
Diet Effect	LPS effect	Interaction (p value)	Data transformation
0.0015	0.461	None	Y=Log(Y)
Tukey's
vs	Deficient Saline	Balanced LPS	Deficient LPS
Balanced Saline	0.2502	0.999	0.0223
Deficient Saline		0.2262	0.6923
Balanced LPS			0.0193
Diet t Test GCL Microglia	0.0013	Data transformation	None
ML Microglia Diet vs LPS Treatment (Sex consolidated data) 2 WAY ANOVA (p value)
Diet Effect	LPS effect	Interaction (p value)	Data transformation
0.0024	0.7559	None	None
Tukey's
vs	Deficient Saline	Balanced LPS	Deficient LPS
Balanced Saline	0.6509	0.4677	0.1424
Deficient Saline		0.0725	0.7612
Balanced LPS			0.0058
Diet t Test ML Microglia	0.0023	Data transformation	None

## Sheet: Microglia Stainig
				GFP Area Fraction
Animal Id	Diet	LPS Tretament	Sex	SGZ	GCL	ML
O1	Balanced	Sal	Female	7.0369	4.2238	5.4278
O15	Balanced	Sal	Female	5.8054	4.0813	5.5466
O16	Balanced	Sal	Female	4.4055	2.893	4.0586
O3	Balanced	Sal	Female	4.0987	2.6007	4.1642
O13	Balanced	Sal	Male	4.1476	2.111	3.3585
O19	Balanced	Sal	Male	3.9349	2.4742	3.8337
O20	Balanced	Sal	Male	5.7676	3.492	4.1472
O17	Balanced	LPS	Female	4.2019	2.733	4.2735
O18	Balanced	LPS	Female	5.6195	3.8173	4.9199
O2	Balanced	LPS	Female	6.3918	4.3927	5.5621
O4	Balanced	LPS	Female	3.5424	2.4774	3.3604
O14	Balanced	LPS	Male	3.2433	2.3064	3.7232
O21	Balanced	LPS	Male	6.9126	4.0921	5.1509
O22	Balanced	LPS	Male	2.9099	2.0606	3.5262
O10	Deficient	Sal	Female	4.2413	2.8878	3.3256
O23	Deficient	Sal	Female	3.9005	2.3393	2.7802
O24	Deficient	Sal	Female	2.7599	1.9196	2.5489
O28	Deficient	Sal	Male	1.9815	1.2514	1.6411
O5	Deficient	Sal	Male	3.2031	2.2786	3.465
O6	Deficient	Sal	Male	2.8785	1.9414	3.339
O11	Deficient	LPS	Female	3.8955	2.5622	4.1083
O12	Deficient	LPS	Female	3.1713	1.9015	3.1651
O25	Deficient	LPS	Female	2.9519	1.9339	3.2518
O26	Deficient	LPS	Female	3.3177	2.185	3.408
O27	Deficient	LPS	Male	2.1785	1.2617	1.9449
O29	Deficient	LPS	Male	3.208	1.8006	2.4985
O7	Deficient	LPS	Male	3.0488	1.7889	2.8403
GFP Area fraction 3 WAY ANOVA (p value)
Condition	Diet effect	LPS effect	Sex effect	Interaction (p value)	Data transformation
SGZ	0.0006	0.5839	0.064	None	Y=Log(Y)
GCL	0.0004	0.5948	0.0184	None	Y=Log(Y)
ML	0.0001	0.7692	0.031	None	Y=Log(Y)
SGZ Area fraction Diet vs Sex (LPS treatment consolidated data) 2 WAY ANOVA (p value)
Diet Effect	Sex effect	Interaction (p value)	Data transformation
0.0002	0.0496	None	Y=Log(Y)
Tukey's
vs	Deficient Female	Balanced Male	Deficient Male
Balanced Female	0.0281	0.6323	0.0005
Deficient Female		0.3686	0.3168
Balanced Male			0.0156
GCL Area fraction Diet vs Sex (LPS treatment consolidated data) 2 WAY ANOVA (p value)
Diet Effect	Sex effect	Interaction (p value)	Data transformation
0.0001	0.011	None	Y=Log(Y)
Tukey's
vs	Deficient Female	Balanced Male	Deficient Male
Balanced Female	0.0146	0.32	0.0001
Deficient Female		0.5183	0.1672
Balanced Male			0.0119
ML Area fraction Diet vs Sex (LPS treatment consolidated data) 2 WAY ANOVA (p value)
Diet Effect	Sex effect	Interaction (p value)	Data transformation
0.0001	0.0222	None	None
Tukey's
vs	Deficient Female	Balanced Male	Deficient Male
Balanced Female	0.0028	0.2569	0.0001
Deficient Female		0.2559	0.4115
Balanced Male			0.0138

## Sheet: Coloc Dcx Microglía
				% of Dcx surveilled by microglia			% of microglia surveilling Dcx
Animal Id	Diet	LPS Tretament	Sex	SGZ	GCL	ML	SGZ	GCL	ML
O1	Balanced	Sal	Female	9.38551	8.07519	8.43357	17.569	10.352	2.28364
O15	Balanced	Sal	Female	7.50062	6.47922	8.77811	16.5967	7.92457	1.94391
O16	Balanced	Sal	Female	5.08654	5.56961	7.37684	12.0171	6.83982	1.81488
O3	Balanced	Sal	Female	5.02574	5.22161	7.83352	11.4162	7.51593	2.09992
O13	Balanced	Sal	Male	5.74864	4.87246	6.7098	11.5074	5.92465	1.74122
O19	Balanced	Sal	Male	4.75001	4.98184	7.56328	10.0038	4.48708	0.871351
O20	Balanced	Sal	Male	6.42054	5.17269	5.89696	10.2401	3.9543	0.441818
O17	Balanced	LPS	Female	5.74195	5.60174	7.67091	15.4781	8.19486	1.40549
O18	Balanced	LPS	Female	5.71906	4.82167	7.121	12.2071	5.38739	1.12721
O2	Balanced	LPS	Female	6.62592	6.70328	9.46049	14.2537	7.38239	1.81169
O4	Balanced	LPS	Female	4.59097	4.86352	5.52001	13.6133	9.31377	2.47967
O14	Balanced	LPS	Male	5.12402	5.46178	8.12314	7.89205	2.99479	0.724078
O21	Balanced	LPS	Male	8.00899	7.45116	8.15755	13.6851	6.5401	1.0669
O22	Balanced	LPS	Male	4.35281	4.10724	7.83973	11.5938	5.05262	0.952219
O10	Deficient	Sal	Female	7.68669	8.43174	11.002	19.112	10.9609	4.25287
O23	Deficient	Sal	Female	5.96203	5.64373	8.60493	18.1546	9.43392	2.46329
O24	Deficient	Sal	Female	4.82946	5.26506	6.2099	11.4372	5.2928	0.969124
O28	Deficient	Sal	Male	3.52551	3.40624	7.39986	20.4038	10.8825	3.51323
O5	Deficient	Sal	Male	4.10057	4.61905	8.35586	7.12398	4.01623	1.06716
O6	Deficient	Sal	Male	3.58751	4.48775	7.57231	10.9017	7.83597	2.24636
O11	Deficient	LPS	Female	4.559	4.74086	8.53244	8.17844	3.99033	0.93758
O12	Deficient	LPS	Female	4.2079	4.34964	6.24897	8.10237	4.50621	0.776319
O25	Deficient	LPS	Female	3.7551	4.97754	10.4648	5.99123	4.27618	1.5339
O26	Deficient	LPS	Female	5.90233	6.09444	8.76983	13.4814	7.45279	1.73722
O27	Deficient	LPS	Male	3.9175	3.34394	4.85222	12.3223	6.99338	1.77439
O29	Deficient	LPS	Male	5.95709	6.51343	7.16471	15.1546	8.03905	1.14687
O7	Deficient	LPS	Male	3.98405	3.61366	6.01396	8.93514	5.59887	1.3466
% of Dcx surveilled by microglia							% of microglia surveilling Dcx
Condition	Diet effect	LPS effect	Sex effect	Interaction (p value)	Data transformation		Condition	Diet effect	LPS effect	Sex effect	Interaction (p value)	Data transformation
SGZ	0.0077	0.5805	0.0529	None	Y=1/Y		SGZ	0.9722	0.157	0.2212	None	None
GCL	0.2219	0.5091	0.0472	None	None		GCL	0.3947	0.1436	0.1068	Diet x Sex (0.0377)	None
ML	0.7826	0.5678	0.0637	None	None		ML	0.1436	0.0432	0.1266	None	None
SGZ surveilled volume Diet vs Sex (LPS treatment consolidated data) 2 WAY ANOVA (p value)							GCL microglial volume dedicated to DCX surveillance Diet and Sex 1 WAY ANOVA (p value)
Diet Effect	Sex effect	Interaction (p value)	Data transformation				General effect	0.0734	Data transformation	None
0.0063	0.0737	None	Y=1/Y
Tukey's
vs	Deficient Female	Balanced Male	Deficient Male
Balanced Female	0.49	0.9414	0.0096
Deficient Female		0.8589	0.1951
Balanced Male			0.0521
GCL surveilled volume Diet vs Sex (LPS treatment consolidated data) 2 WAY ANOVA (p value)							ML surveilled volume Diet vs Treatment (Sex consolidated data) 2 WAY ANOVA (p value)
Diet Effect	Sex effect	Interaction (p value)	Data transformation				Diet Effect	Sex effect	Interaction (p value)	Data transformation
0.0587	0.0173	None	Y=1/Y				0.3104	0.1225	None	Y=Log(Y)
Tukey's
vs	Deficient Female	Balanced Male	Deficient Male
Balanced Female	0.9522	0.7967	0.0165
Deficient Female		0.9777	0.0594
Balanced Male			0.1529
ML surveilled volume Diet vs Sex (LPS treatment consolidated data) 2 WAY ANOVA (p value)
Diet Effect	Sex effect	Interaction (p value)	Data transformation
0.7892	0.0641	None	None

## Sheet: Astrocytes
				Total Astrocytes
Animal Id	Diet	LPS Tretament	Sex	SGZ	GCL	ML
O1	Balanced	Sal	Female	2666.43	4355.73	3752.95
O15	Balanced	Sal	Female	1859.58	3786.02	3851.31
O16	Balanced	Sal	Female	1838.32	2753.15	2150.72
O3	Balanced	Sal	Female	1465.45	1801.54	2806.48
O13	Balanced	Sal	Male	2112.92	3747.38	3702.18
O19	Balanced	Sal	Male	2216.34	2948.48	3497.88
O20	Balanced	Sal	Male	2718.03	3908.11	4410.99
O17	Balanced	LPS	Female	2768.19	2819.75	3470.14
O18	Balanced	LPS	Female	1657.33	3116.25	3080.64
O2	Balanced	LPS	Female	1319.21	2053.97	1851.37
O4	Balanced	LPS	Female	1304.86	2307.83	3171.65
O14	Balanced	LPS	Male	1528.91	2475.07	2795.04
O21	Balanced	LPS	Male	1819.49	2860.1	2801.43
O22	Balanced	LPS	Male	1921.85	2756.18	3783.32
O10	Deficient	Sal	Female	2012.5	4806.55	3262.63
O23	Deficient	Sal	Female	1974.69	2572.92	2202.88
O24	Deficient	Sal	Female	1977.18	2959.31	3392.73
O28	Deficient	Sal	Male	2697.82	3345.73	3143.99
O5	Deficient	Sal	Male	982.532	2369.08	2651.89
O6	Deficient	Sal	Male	1132.53	1826.1	2007.32
O11	Deficient	LPS	Female	1818.61	3842.07	2625.44
O12	Deficient	LPS	Female	1601.55	2885.03	3585.32
O25	Deficient	LPS	Female	1732.15	2232.98	2363.05
O26	Deficient	LPS	Female	1864.89	2707.51	2150.98
O27	Deficient	LPS	Male	1365.35	2107.55	3255.88
O29	Deficient	LPS	Male	1639.51	2211.63	3484.34
O7	Deficient	LPS	Male	1486.69	2057.42	2482.58
Astrocytes 3 WAY ANOVA (p value)
Condition	Diet effect	LPS effect	Sex effect	Interaction (p value)	Data transformation
SGZ	0.2771	0.0405	0.3694	None	Y=sin(Y)
GCL	0.2967	0.1265	0.3505	Diet x Sex (0.0343)	Y=1/Y
ML	0.1015	0.4399	0.3278	None	None
SGZ astrocytes Diet vs LPS treatment (Sex consolidated data) 2 WAY ANOVA (p value)
Diet Effect	LPS effect	Interaction (p value)	Data transformation
0.2793	0.0218	None	Y=sin(Y)
Tukey's
vs	Deficient Saline	Balanced LPS	Deficient LPS
Balanced Saline	0.5814	0.6096	0.7641
Deficient Saline		0.091	0.1469
Balanced LPS			0.9935
LPS t Test SGZ astrocytes	0.1409	Data transformation	None
GCL astrocytes Diet and Sex 1 WAY ANOVA (p value)
General effect	0.2187	Data transformation	None

[truncated: 2 more sheets: Correlation matrix, PCA]
